# Supplementary material for: Knockdown of NCAPD3 inhibits the tumorigenesis of non-small cell lung cancer by regulation of the PI3K/Akt pathway
Source: Springer Nature journal article supplement (doi:10.1186/s12885-024-12131-x), 2024-04-02
Supplement: MOESM2 [file 26934506]

## Corresponds to Figure 2

Figure 2-(a)-GAPDH

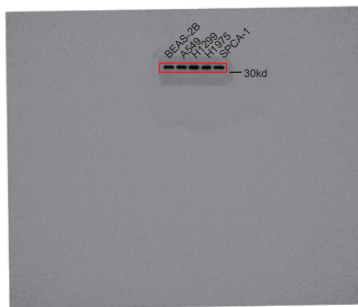

Figure 2-(a)-NCAPD3

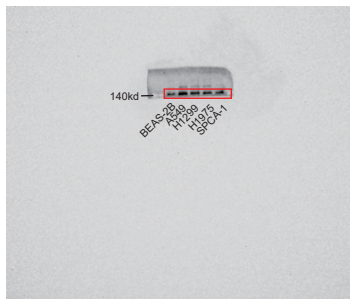

Figure 2-(d)-A549-GAPDH

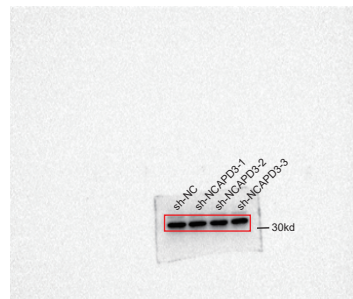

Figure 2-(d)-A549-NCAPD3

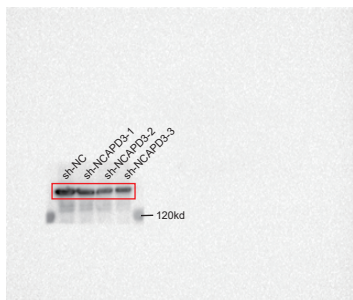

Figure 2-(d)-SPCA-1-GAPDH

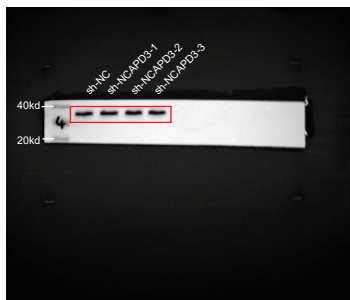

Figure 2-(d)-SPCA-1-NCAPD3

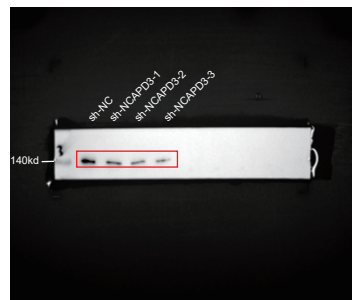

## Corresponds to Figure 3 (c)

Figure 3-(c)-A549-Bcl-2

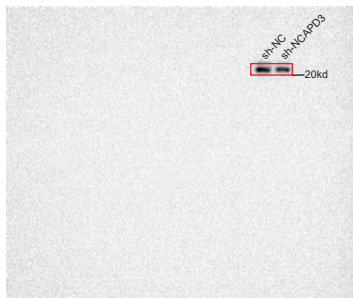

Figure 3-(c)-SPCA-1-Bcl-2

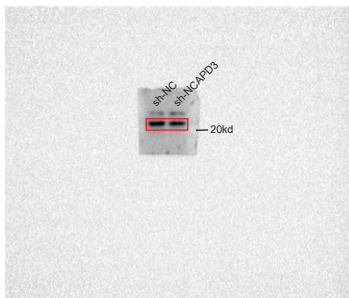

Figure 3-(c)-A549-Bax

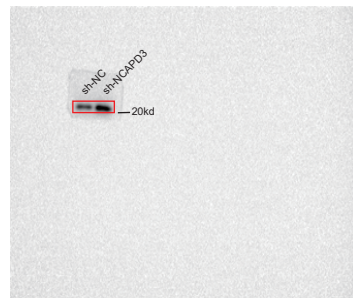

Figure 3-(c)-SPCA-1-Bax

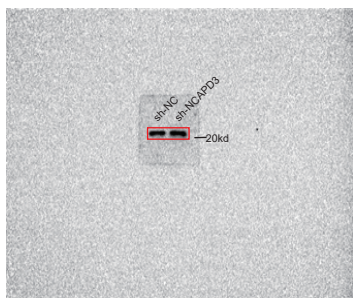

Figure 3-(c)-A549-Caspase-8

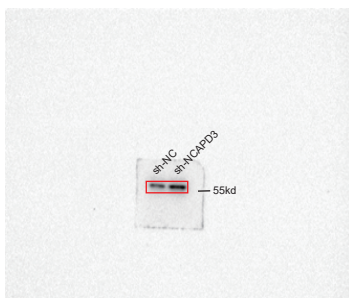

Figure 3-(c)-SPCA-1-Caspase-8

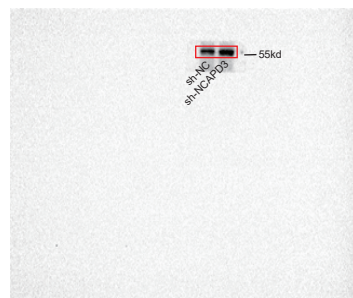

# Corresponds to Figure 3(c)

Figure 3-(c)-A549-GAPDH

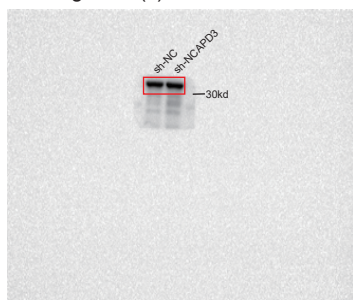

Figure 3-(c)-SPCA-1-GAPDH

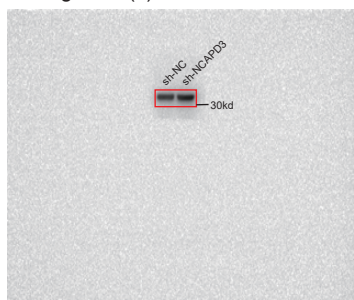

Figure 3-(c)-A549-CyclinD1

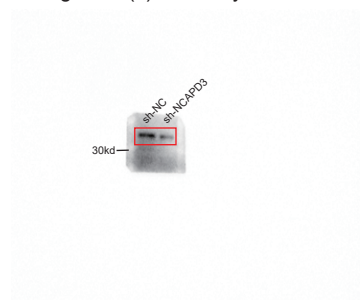

Figure 3-(c)-SPCA-1-CyclinD1

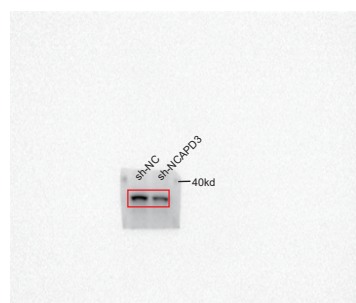

Figure 3-(c)-A549-Cdk4

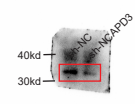

Figure 3-(c)-SPCA-1-Cdk4

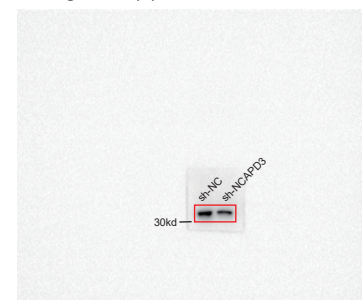

Figure 3-(c)-A549-P27

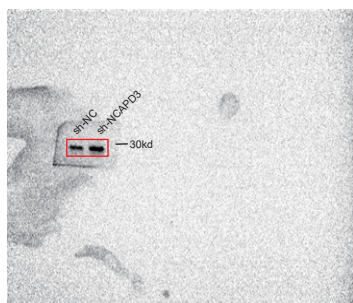

Figure 3-(c)-SPCA-1-P27

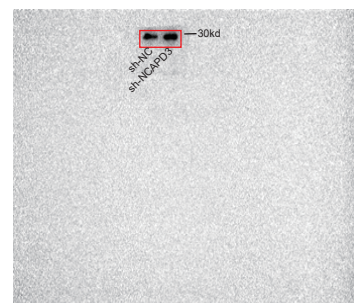

Figure 3-(c)-A549-GAPDH

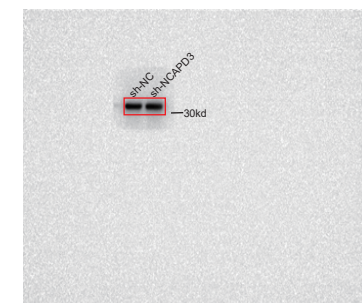

Figure 3-(c)-SPCA-1-GAPDH

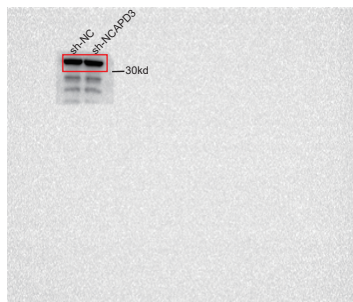

**Corresponds to Figure 4 (c)**

Figure 4-(c)-A549-PI3K

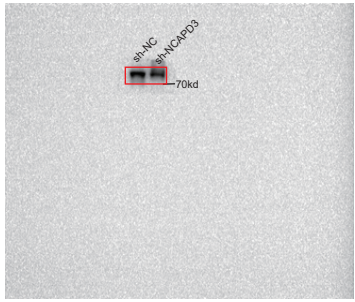

Figure 4-(c)-SPCA-1-PI3K

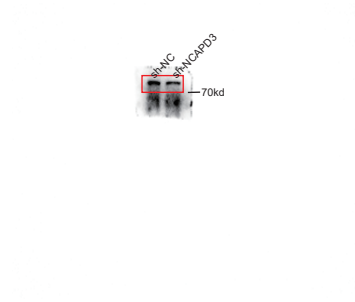

Figure 4-(c)-A549-AKT

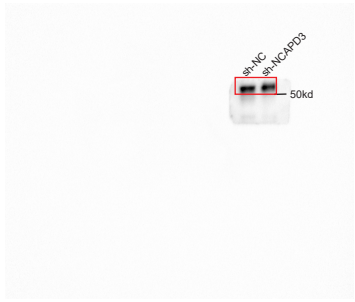

Figure 4-(c)-SPCA-1-AKT

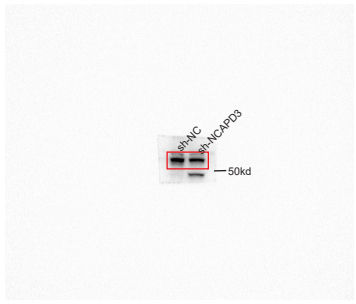

Figure 4-(c)-A549-pAKT

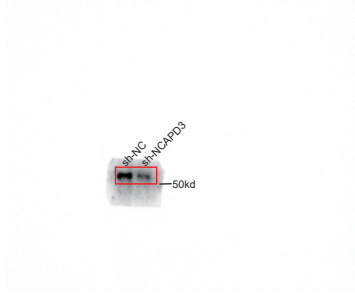

Figure 4-(c)-SPCA-1-pAKT

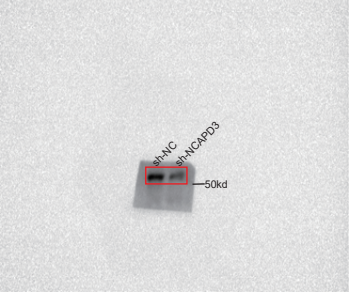

Figure 4-(c)-A549-FOXO4

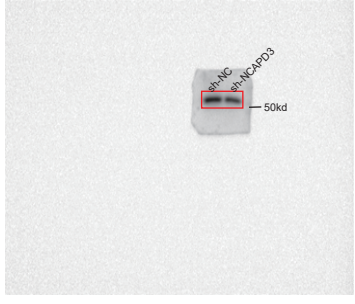

Figure 4-(c)-SPCA-1-FOXO4

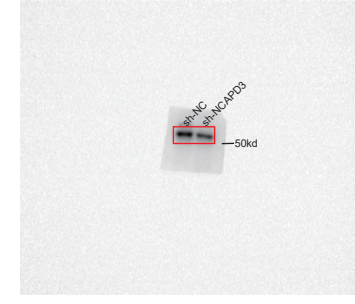

Figure 4-(c)-A549-pFOXO4

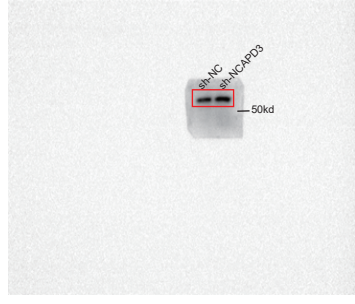

Figure 4-(c)-SPCA-1-pFOXO4

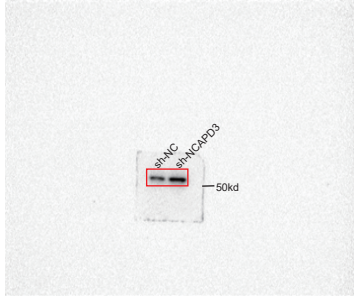

Figure 4-(c)-A549-GAPDH

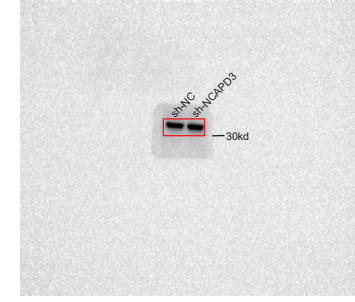

Figure 4-(c)-SPCA-1-GAPDH

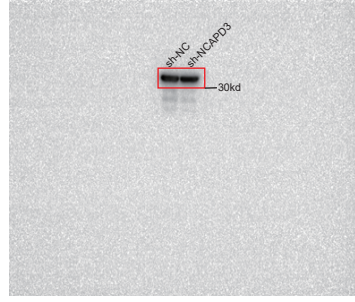

# Corresponds to Figure 4 (d)

Figure 4-(d)-A549-Bcl-2

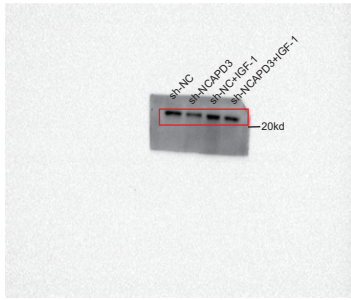

Figure 4-(d)-SPCA-1-Bcl-2

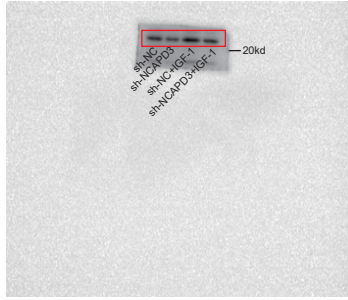

Figure 4-(d)-A549-Bax

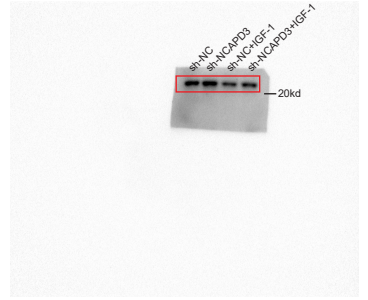

Figure 4-(d)-SPCA-1-Bax

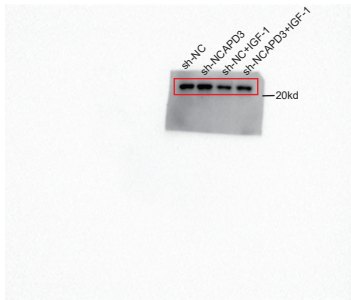

Figure 4-(d)-A549-Caspase-8

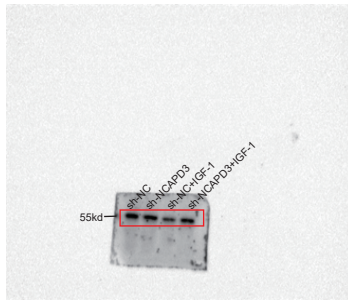

Figure 4-(d)-SPCA-1-Caspase-8

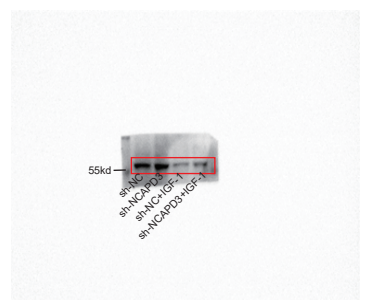

Figure 4-(d)-A549-Cyclin D1

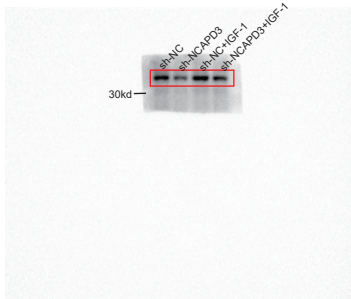

Figure 4-(d)-SPCA-1-Cyclin D1

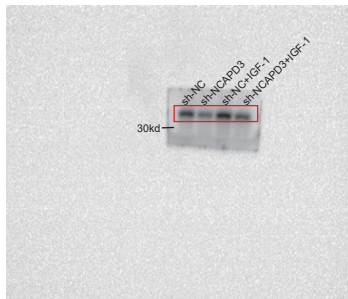

Figure 4-(d)-A549-Cdk4

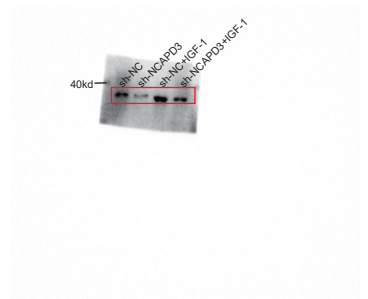

Figure 4-(d)-SPCA-1-Cdk4

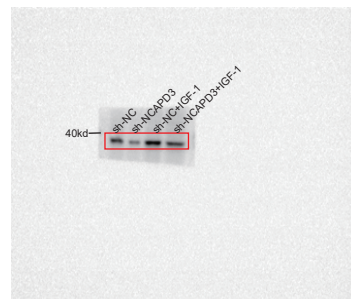

Figure 4-(d)-A549-P27

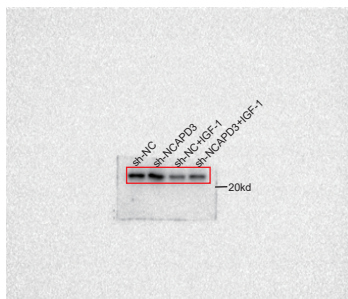

Figure 4-(d)-SPCA-1-P27

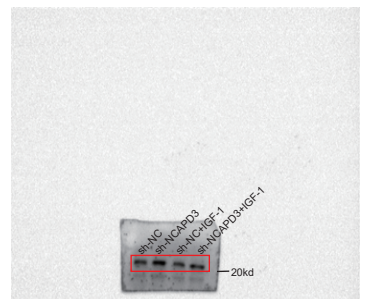

# Corresponds to Figure 4 (d)

Figure 4-(d)-A549-GAPDH

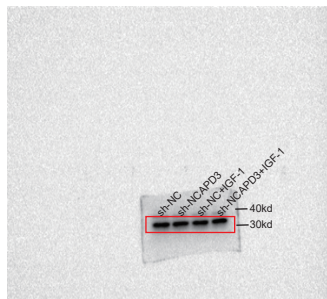

Figure 4-(d)-SPCA-1-GAPDH

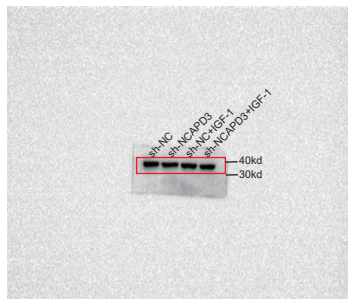

*Statement:* The membranes were cut prior to antibody hybridization, resulting in the absence of the full-length blot.
